# Supplementary material for: Incidence and Predictors of Clinically Significant Bleedings after Transcatheter Left Atrial Appendage Closure
Source: MDPI journal article supplement (doi:10.3390/ijerph192113802), 2022-10-24
Supplement: s1 [file s1]

**Table S1.** Indications for temporary reintroduction of anticoagulant treatment.

| Indications                                        | Number of patients |
|----------------------------------------------------|--------------------|
| Device-related thrombus                            | 9                  |
| Significant peridevice leak                        | 2                  |
| Native mitral valve thrombus                       | 1                  |
| Superficial thrombophlebitis                       | 1                  |
| Peripheral artery disease                          | 1                  |
| Temporary alternative to dual antiplatelet therapy | 1                  |

**Table S2.** Comparison of baseline clinical, echocardiographic and procedural characteristics stratified according to bleeding history before LAAC.

| Variable                                                  | No bleed-<br>ing his-<br>tory<br>(n=45) | Skin/oral/ocu-<br>lar bleeding<br>(n=18) | Intracra-<br>nial bleed-<br>ing (n=35) | Genitouri-<br>nary bleeding<br>(n=15) | Gastrointesti-<br>nal bleeding<br>(n=52) | Epistaxis<br>(n=13) | Multiple<br>sites<br>(n=17) | p-value |
|-----------------------------------------------------------|-----------------------------------------|------------------------------------------|----------------------------------------|---------------------------------------|------------------------------------------|---------------------|-----------------------------|---------|
| Female gender, n (%)                                      | 22 (48.9)                               | 11 (61.1)                                | 13 (37.1)                              | 6 (40.0)                              | 23 (44.2)                                | 2 (15.4)            | 7 (41.2)                    | 0.260   |
| Age (years);<br>median (IQR)                              | 73 (61–79)                              | 77 (69–84)*                              | 73 (66–79)                             | 73 (64–80)                            | 77 (69–83)*                              | 74 (65–84)          | 76 (69–82)                  | 0.191   |
| HAS-BLED score;<br>median (IQR)                           | 2 (1–3)                                 | 2 (1–4)                                  | 3 (2–4)*                               | 2 (2–3)                               | 3 (2–4)*                                 | 2 (2–3)             | 3 (2–4)*                    | 0.004   |
| Predicted annual<br>bleeding risk;<br>median (IQR)        | 4 (3–6)                                 | 4 (3–9)                                  | 6 (4–9)*                               | 4 (4–6)                               | 6 (4–9)*                                 | 4 (4–6)             | 6 (4–7)*                    | 0.004   |
| Comorbidities                                             |                                         |                                          |                                        |                                       |                                          |                     |                             |         |
| Hypertension, n (%)                                       | 38 (84.4)                               | 16 (88.9)                                | 31 (88.6)                              | 12 (80.0)                             | 44 (84.6)                                | 11 (84.6)           | 14 (82.4)                   | 0.982   |
| Diabetes mellitus, n<br>(%)                               | 15 (33.3)                               | 4 (22.2)                                 | 15 (42.9)                              | 5 (33.3)                              | 11 (21.2)                                | 4 (30.8)            | 5 (29.4)                    | 0.479   |
| Smoking history, n<br>(%)                                 | 10 (22.2)                               | 3 (16.7)                                 | 13 (37.1)                              | 3 (20.0)                              | 11 (21.2)                                | 7 (53.8)*           | 5 (29.4)                    | 0.180   |
| Prior ischemic<br>stroke/TIA/PE, n (%)                    | 28 (62.2)                               | 3 (16.7)*                                | 6 (17.1)*                              | 4 (26.7)*                             | 13 (25.0)*                               | 3 (23.1)*           | 3 (17.6)*                   | <0.001  |
| Coronary artery dis-<br>ease, n (%)                       | 16 (35.6)                               | 11 (64.7)                                | 12 (34.3)                              | 5 (35.7)                              | 28 (54.9)                                | 10 (76.9)*          | 8 (47.1)                    | 0.037   |
| PCI/CABG history, n<br>(%)                                | 13 (28.9)                               | 9 (50.0)                                 | 9 (25.7)                               | 4 (26.7)                              | 22 (42.3)                                | 9 (69.2)*           | 6 (35.3)                    | 0.079   |
| MI history, n (%)                                         | 8 (17.8)                                | 6 (33.3)                                 | 8 (22.9)                               | 2 (13.3)                              | 17 (32.7)                                | 6 (46.2)            | 8 (47.1)*                   | 0.110   |
| Carotid/peripheral ar-<br>tery disease, n (%)             | 8 (17.8)                                | 3 (16.7)                                 | 5 (14.3)                               | 2 (13.3)                              | 8 (15.4)                                 | 1 (7.7)             | 5 (29.4)                    | 0.836   |
| Pacemaker/ICD im-<br>planted, n (%)                       | 9 (20.0)                                | 6 (33.3)                                 | 7 (20.0)                               | 5 (33.3)                              | 10 (19.2)                                | 4 (30.8)            | 4 (23.5)                    | 0.737   |
| Permanent atrial fi-<br>brillation, n (%)                 | 19 (42.2)                               | 5 (27.8)                                 | 16 (45.7)                              | 9 (60.0)                              | 29 (55.8)                                | 9 (69.2)            | 9 (52.9)                    | 0.235   |
| Cancer history, n (%)                                     | 4 (8.9)                                 | 3 (16.7)                                 | 3 (8.6)                                | 4 (26.7)                              | 11 (21.2)                                | 3 (23.1)            | 2 (11.8)                    | 0.349   |
| Venous thromboem-<br>bolism history, n (%)                | 2 (4.4)                                 | 1 (5.6)                                  | 1 (2.9)                                | 0 (0.0)                               | 3 (5.8)                                  | 3 (15.4)            | 3 (17.6)                    | 0.263   |
| Bleedings history<br>while on anticoagula-<br>tion, n (%) | 0 (0.0)                                 | 13 (72.2)*                               | 28 (80.0)*                             | 15 (100)*                             | 42 (80.8)*                               | 12 (92.3)*          | 14 (82.4)*                  | <0.001  |

| Transthoracic ECHO parameters                         |               |               |               |               |               |               |               |       |
|-------------------------------------------------------|---------------|---------------|---------------|---------------|---------------|---------------|---------------|-------|
| LVEF <40%, <i>n</i> (%)                               | 1 (2.2)       | 3 (16.7)      | 3 (8.6)       | 0 (0.0)       | 3 (5.8)       | 4 (30.8)*     | 1 (5.9)       | 0.030 |
| Moderate-to-severe mitral regurgitation, <i>n</i> (%) | 5 (11.1)      | 2 (11.1)      | 6 (17.1)      | 1 (6.7)       | 14 (26.9)     | 0 (0.0)       | 2 (11.8)      | 0.138 |
| Laboratory results                                    |               |               |               |               |               |               |               |       |
| Hemoglobin (g/dL); median (IQR)                       | 13 (12–15)    | 13 (11–15)    | 14 (12–15)    | 14 (13–15)    | 12 (11–13)*   | 13 (11–15)    | 13 (11–14)    | 0.007 |
| Anemia, <i>n</i> (%)                                  | 13 (28.9)     | 4 (22.2)      | 7 (20.0)      | 3 (20.0)      | 30 (57.7)*    | 8 (61.5)      | 9 (52.9)      | 0.001 |
| Platelets (10 <sup>3</sup> /mL); median (IQR)         | 183 (135–225) | 205 (137–244) | 183 (152–226) | 183 (150–220) | 181 (136–235) | 184 (123–233) | 183 (122–228) | 0.994 |
| eGFR <60 ml/min/1.73m <sup>2</sup> , <i>n</i> (%)     | 18 (40.0)     | 10 (55.6)     | 10 (28.6)     | 6 (40.0)      | 34 (65.4)*    | 6 (46.2)      | 9 (52.9)      | 0.030 |

\**p*<0.05 for the difference in comparison to the group with no bleeding history.

CABG = coronary artery bypass grafting; eGFR = estimated glomerular filtration rate; ICD = implantable cardioverter–defibrillator; IQR = interquartile range; LAAC = left atrial appendage closure; LVEF = left ventricle ejection fraction; MI = myocardial infarction; PCI = percutaneous coronary intervention; PE = peripheral embolus; TIA = transient ischemic attack
